# Supplementary material for: Efficient and tunable white-light emission of metal–organic frameworks by iridium-complex encapsulation
Source: Springer Nature journal article supplement (doi:10.1038/ncomms3717), 2013-11-11
Supplement: 41467_2013_BFncomms3717_MOESM1_ESM.mol [file 41467_2013_BFncomms3717_MOESM1_ESM.mol]

  ChemDraw10301305342D

 45 48  0  0  0  0  0  0  0  0999 V2000
   -0.7157   -0.4125    0.0000 N   0  0  0  0  0  0  0  0  0  0  0  0
   -0.0012   -0.8250    0.0000 C   0  0  0  0  0  0  0  0  0  0  0  0
    0.7133   -0.4125    0.0000 N   0  0  0  0  0  0  0  0  0  0  0  0
    0.7133    0.4125    0.0000 C   0  0  0  0  0  0  0  0  0  0  0  0
   -0.0012    0.8250    0.0000 N   0  0  0  0  0  0  0  0  0  0  0  0
   -0.7157    0.4125    0.0000 C   0  0  0  0  0  0  0  0  0  0  0  0
   -1.4277    0.8236    0.0000 N   0  0  0  0  0  0  0  0  0  0  0  0
   -1.4277    1.6458    0.0000 C   0  0  0  0  0  0  0  0  0  0  0  0
    1.4253    0.8236    0.0000 N   0  0  0  0  0  0  0  0  0  0  0  0
    2.1374    0.4125    0.0000 C   0  0  0  0  0  0  0  0  0  0  0  0
   -0.0012   -1.6472    0.0000 N   0  0  0  0  0  0  0  0  0  0  0  0
   -0.7133   -2.0583    0.0000 C   0  0  0  0  0  0  0  0  0  0  0  0
   -0.7133    2.0583    0.0000 C   0  0  0  0  0  0  0  0  0  0  0  0
   -0.7133    2.8833    0.0000 C   0  0  0  0  0  0  0  0  0  0  0  0
   -1.4277    3.2958    0.0000 C   0  0  0  0  0  0  0  0  0  0  0  0
   -2.1422    2.8833    0.0000 C   0  0  0  0  0  0  0  0  0  0  0  0
   -2.1422    2.0583    0.0000 C   0  0  0  0  0  0  0  0  0  0  0  0
    2.1374   -0.4125    0.0000 C   0  0  0  0  0  0  0  0  0  0  0  0
    2.8519   -0.8250    0.0000 C   0  0  0  0  0  0  0  0  0  0  0  0
    3.5663   -0.4125    0.0000 C   0  0  0  0  0  0  0  0  0  0  0  0
    3.5663    0.4125    0.0000 C   0  0  0  0  0  0  0  0  0  0  0  0
    2.8519    0.8250    0.0000 C   0  0  0  0  0  0  0  0  0  0  0  0
   -1.4277   -1.6458    0.0000 C   0  0  0  0  0  0  0  0  0  0  0  0
   -2.1422   -2.0583    0.0000 C   0  0  0  0  0  0  0  0  0  0  0  0
   -2.1422   -2.8833    0.0000 C   0  0  0  0  0  0  0  0  0  0  0  0
   -1.4277   -3.2958    0.0000 C   0  0  0  0  0  0  0  0  0  0  0  0
   -0.7133   -2.8833    0.0000 C   0  0  0  0  0  0  0  0  0  0  0  0
   -0.0012    3.2945    0.0000 C   0  0  0  0  0  0  0  0  0  0  0  0
   -2.8543    1.6472    0.0000 C   0  0  0  0  0  0  0  0  0  0  0  0
    2.8519    1.6472    0.0000 C   0  0  0  0  0  0  0  0  0  0  0  0
    2.8519   -1.6472    0.0000 C   0  0  0  0  0  0  0  0  0  0  0  0
   -0.0012   -3.2945    0.0000 C   0  0  0  0  0  0  0  0  0  0  0  0
   -2.8543   -1.6472    0.0000 C   0  0  0  0  0  0  0  0  0  0  0  0
    3.5639    2.0583    0.0000 O   0  0  0  0  0  0  0  0  0  0  0  0
    2.1398   -2.0583    0.0000 O   0  0  0  0  0  0  0  0  0  0  0  0
   -0.0012   -4.1167    0.0000 O   0  0  0  0  0  0  0  0  0  0  0  0
   -2.8543   -0.8250    0.0000 O   0  0  0  0  0  0  0  0  0  0  0  0
   -3.5663    2.0583    0.0000 O   0  0  0  0  0  0  0  0  0  0  0  0
    0.7109    2.8833    0.0000 O   0  0  0  0  0  0  0  0  0  0  0  0
   -0.0012    4.1167    0.0000 O   0  0  0  0  0  0  0  0  0  0  0  0
   -2.8543    0.8250    0.0000 O   0  0  0  0  0  0  0  0  0  0  0  0
   -3.5663   -2.0583    0.0000 O   0  0  0  0  0  0  0  0  0  0  0  0
    0.7109   -2.8833    0.0000 O   0  0  0  0  0  0  0  0  0  0  0  0
    3.5639   -2.0583    0.0000 O   0  0  0  0  0  0  0  0  0  0  0  0
    2.1398    2.0583    0.0000 O   0  0  0  0  0  0  0  0  0  0  0  0
  1  2  2  0      
  2  3  1  0      
  3  4  2  0      
  4  5  1  0      
  5  6  2  0      
  6  1  1  0      
  6  7  1  0      
  7  8  1  0      
  4  9  1  0      
  9 10  1  0      
  2 11  1  0      
 11 12  1  0      
  8 13  2  0      
 13 14  1  0      
 14 15  2  0      
 15 16  1  0      
 16 17  2  0      
 17  8  1  0      
 10 18  2  0      
 18 19  1  0      
 19 20  2  0      
 20 21  1  0      
 21 22  2  0      
 22 10  1  0      
 12 23  2  0      
 23 24  1  0      
 24 25  2  0      
 25 26  1  0      
 26 27  2  0      
 27 12  1  0      
 14 28  1  0      
 17 29  1  0      
 22 30  1  0      
 19 31  1  0      
 27 32  1  0      
 24 33  1  0      
 30 34  2  0      
 31 35  2  0      
 32 36  2  0      
 33 37  2  0      
 29 38  2  0      
 28 39  2  0      
 28 40  1  0      
 29 41  1  0      
 33 42  1  0      
 32 43  1  0      
 31 44  1  0      
 30 45  1  0      
M  END
