# Supplementary material for: Efficient and tunable white-light emission of metal–organic frameworks by iridium-complex encapsulation
Source: PubMed Central journal article supplement — Nat Commun. 2013 Nov 11;4:2717. doi: 10.1038/ncomms3717 (PMC3831296; doi:10.1038/ncomms3717), 2013-11-11
Supplement: ncomms3717-s1.pdf [file ncomms3717-s1.pdf]

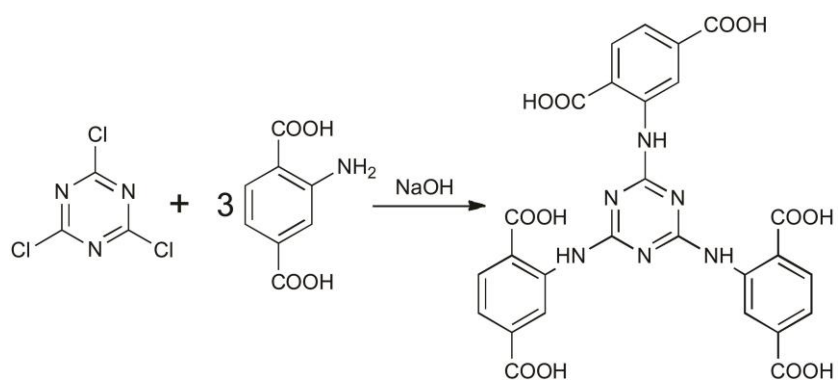

**Supplementary Figure S1** Scheme of synthesis of the H<sub>6</sub>TATPT ligand.

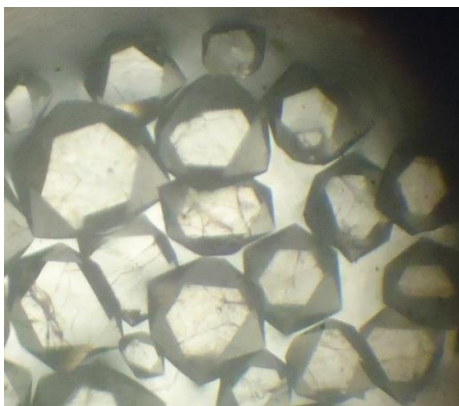

**Supplementary Figure S2** Photograph of crystals of compound 1.

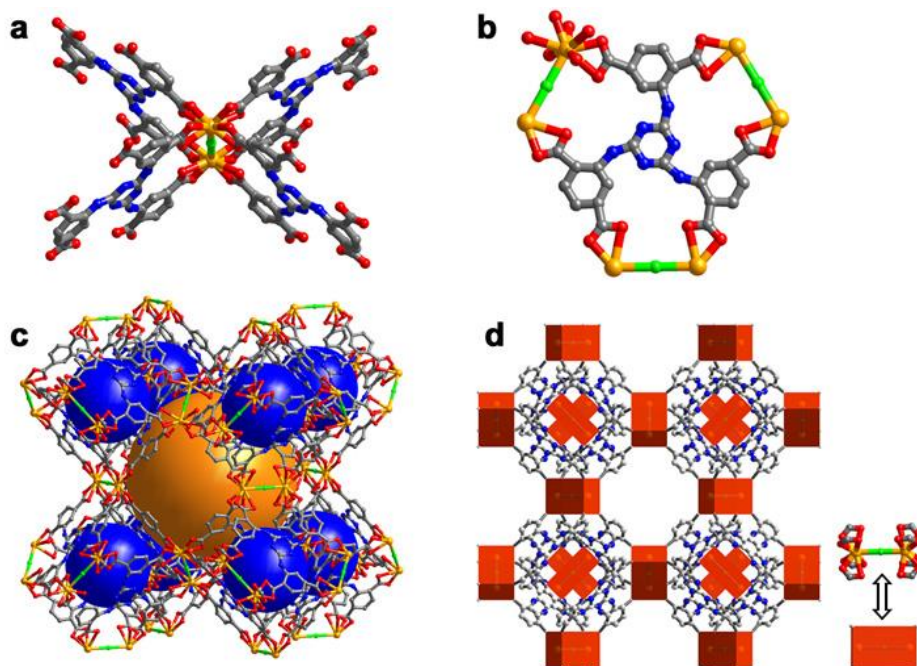

**Supplementary Figure S3 Crystal structures of compound 1.** (a) The coordination environment of Cd<sup>2+</sup> ion and its connectivity with TATPT ligands, C gray, O red, N blue, Cl green and Cd orange. (b) Coordination mode of TATPT ligand. (c) Ball and stick representations show the 3D structure in **1** viewed along the *a*-axis. The orange and blue spheres represent the void inside the cages. (d) Polyhedral representations of the crystal structure viewed along a axis in which the cuboid represented the Cd<sub>2</sub>(μ<sub>2</sub>-Cl)(CO<sub>2</sub>)<sub>8</sub> secondary building unit (SBU).

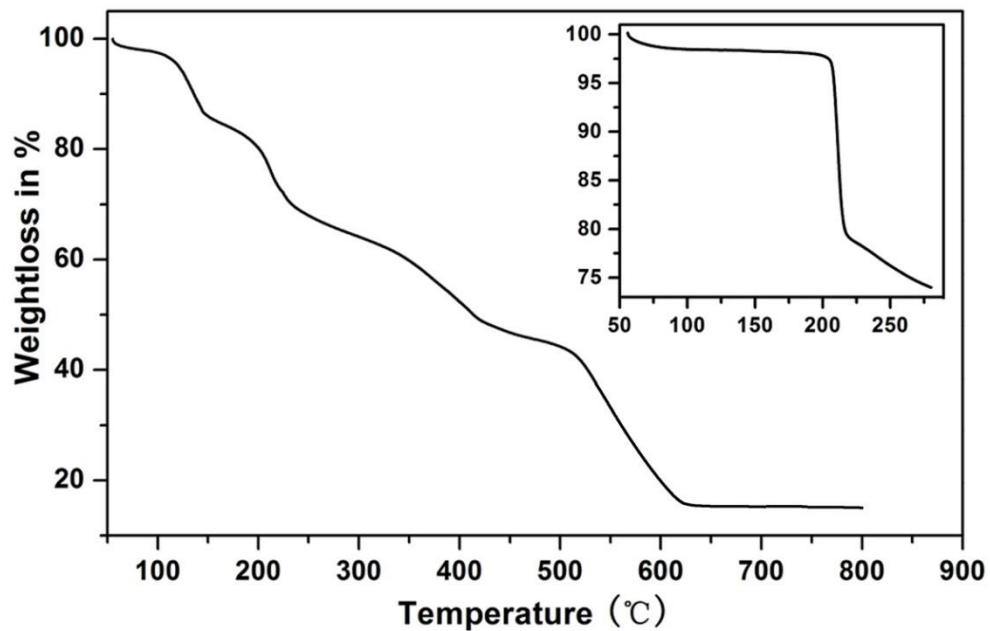

**Supplementary Figure S4 TG profile.** TG profile of compound **1** under nitrogen gas atmosphere with a heating rate of  $10\text{ }^{\circ}\text{C}\cdot\text{min}^{-1}$ . The inset is the TG profile of desolvated **1** from 50 to 280  $^{\circ}\text{C}$  under nitrogen gas with a heating rate of  $2\text{ }^{\circ}\text{C}\cdot\text{min}^{-1}$ .

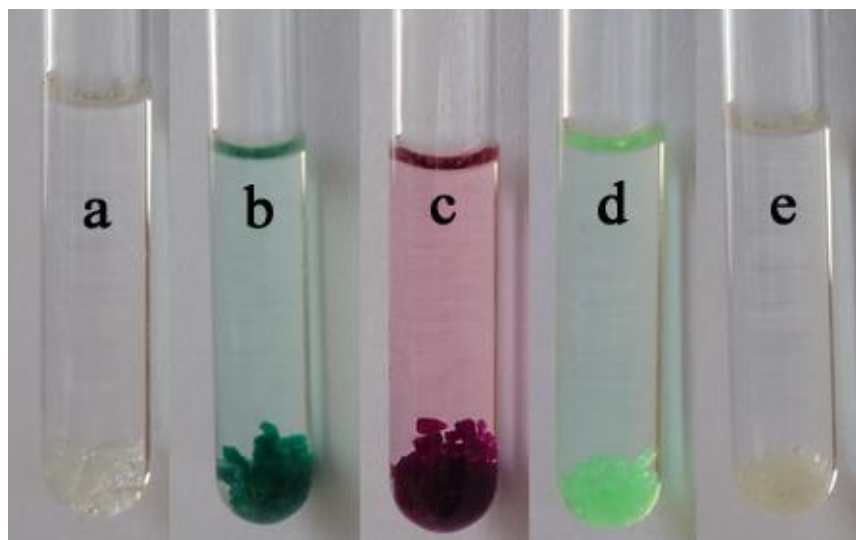

**Supplementary Figure S5 Photographs of 1 and samples after ion exchange with transition metals. (a) As-synthesized 1. (b) Cu<sup>2+</sup>⊃1. (c) Co<sup>2+</sup>⊃1. (d) Ni<sup>2+</sup>⊃1. (e) Zn<sup>2+</sup>⊃1.**

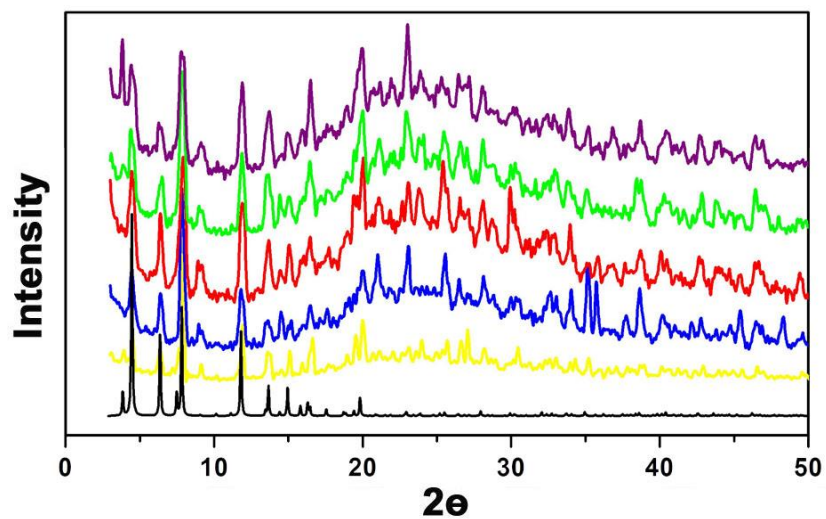

**Supplementary Figure S6 PXRD patterns.** PXRD patterns for **1** and transition metal ion exchanged **1**. simulated, black; as-synthesized **1**, yellow; Co<sup>2+</sup>⊃**1**, blue; Ni<sup>2+</sup>⊃**1**, red; Zn<sup>2+</sup>⊃**1**, green; Cu<sup>2+</sup>⊃**1**, purple.

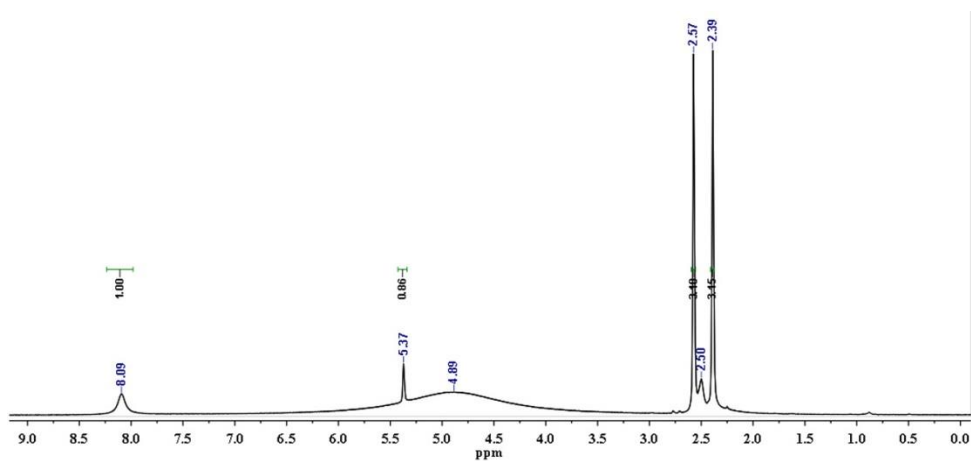

**Supplementary Figure S7**  $^1\text{H}$  NMR spectrum. The  $^1\text{H}$  NMR spectrum in  $\text{dms0-d}_6$  solution taken after ion exchange experiment.

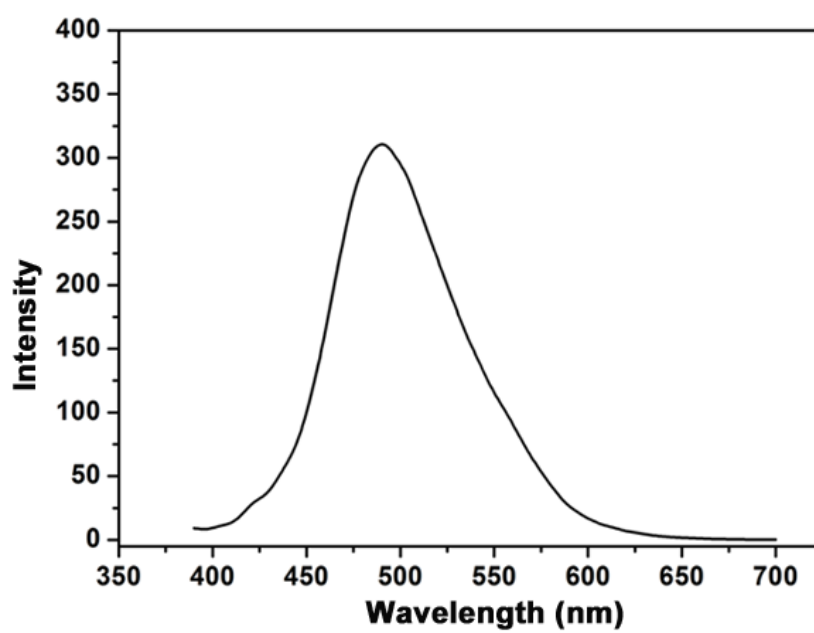

**Supplementary Figure S8 photoluminescence spectrum of ligand.** Solid photoluminescence spectrum of H<sub>6</sub>TATPT ligand at room temperature ( $\lambda_{\text{ex}} = 370$  nm).



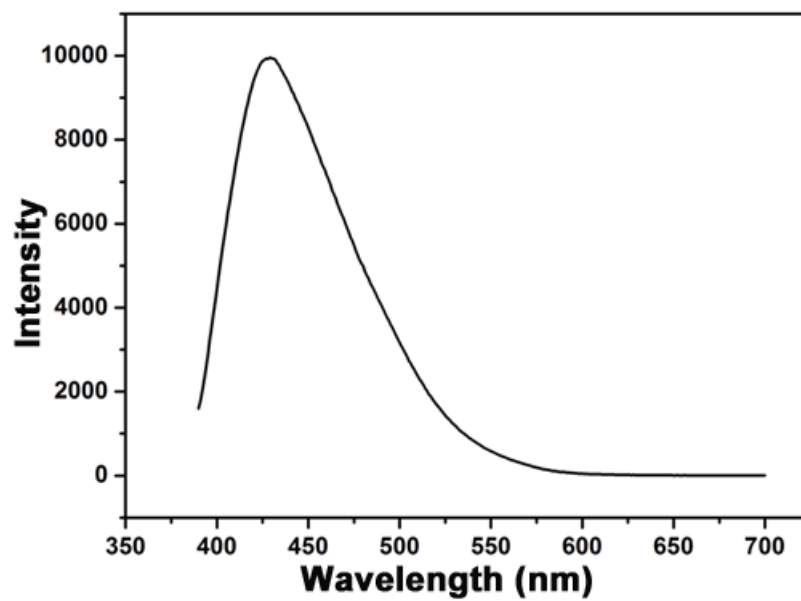

**Supplementary Figure S9** photoluminescence spectrum of **1**. Solid photoluminescence spectrum of compound **1** at room temperature upon excitation at 370 nm.

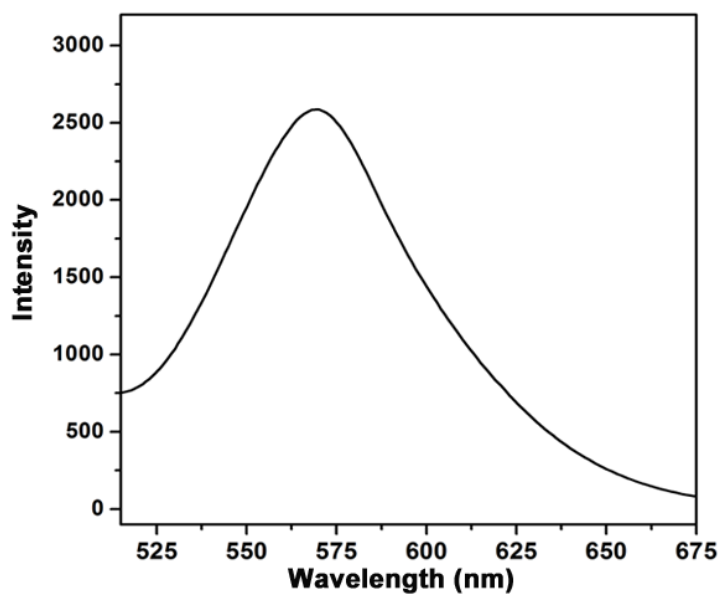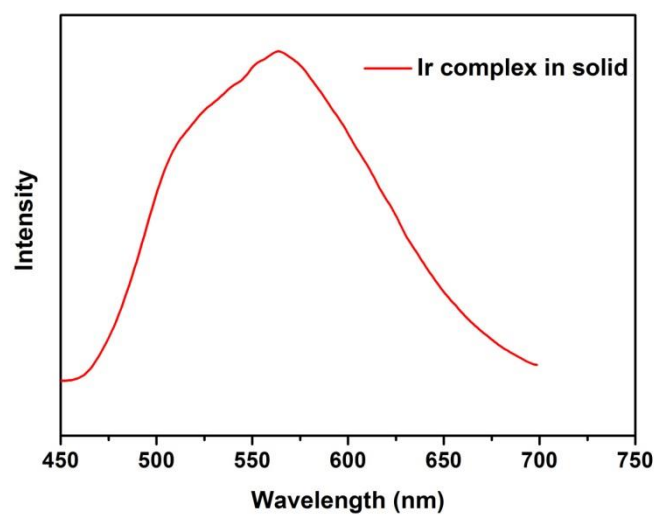

Supplementary Figure S10 photoluminescence spectra of [Ir(ppy)<sub>2</sub>(bpy)][PF<sub>6</sub>]. Room temperature photoluminescence spectra of [Ir(ppy)<sub>2</sub>(bpy)][PF<sub>6</sub>] in DMF solvent (top) and in solid state (bottom) upon

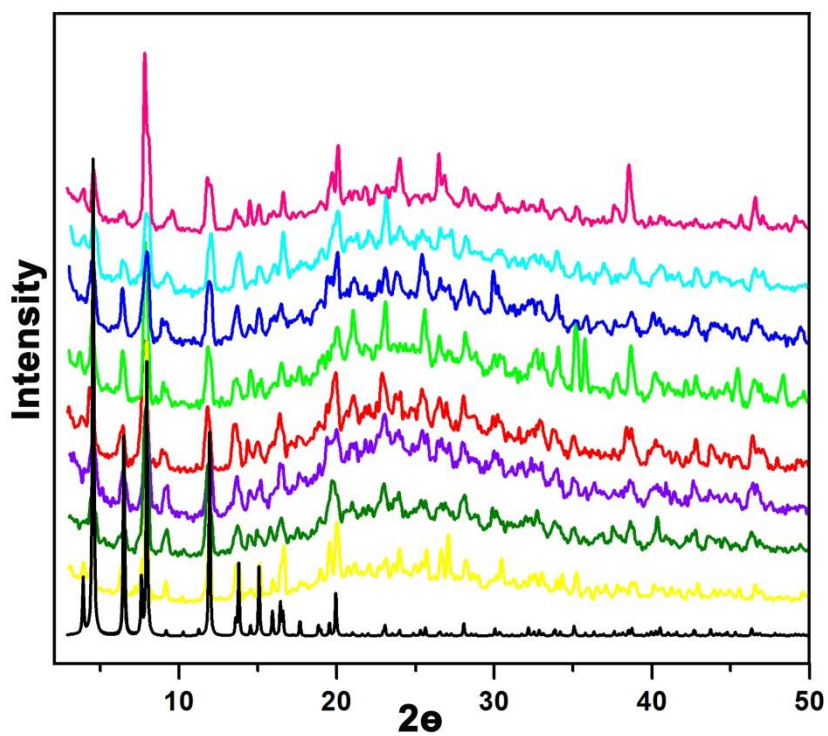

**Supplementary Figure S11 XRD patterns.** XRD patterns for **1** (simulated, black; as-synthesized**1**, yellow) and  $[\text{Ir}(\text{ppy})_2(\text{bpy})]^+$  encapsulated **1** with different concentrations of  $[\text{Ir}(\text{ppy})_2(\text{bpy})]^+$  (0.52wt%, olive; 1.04wt%, violet; 3.5wt%, red; 3.7wt%, green; 4.5wt%, blue; 7.5wt%, cyan; 8.8wt% pink).

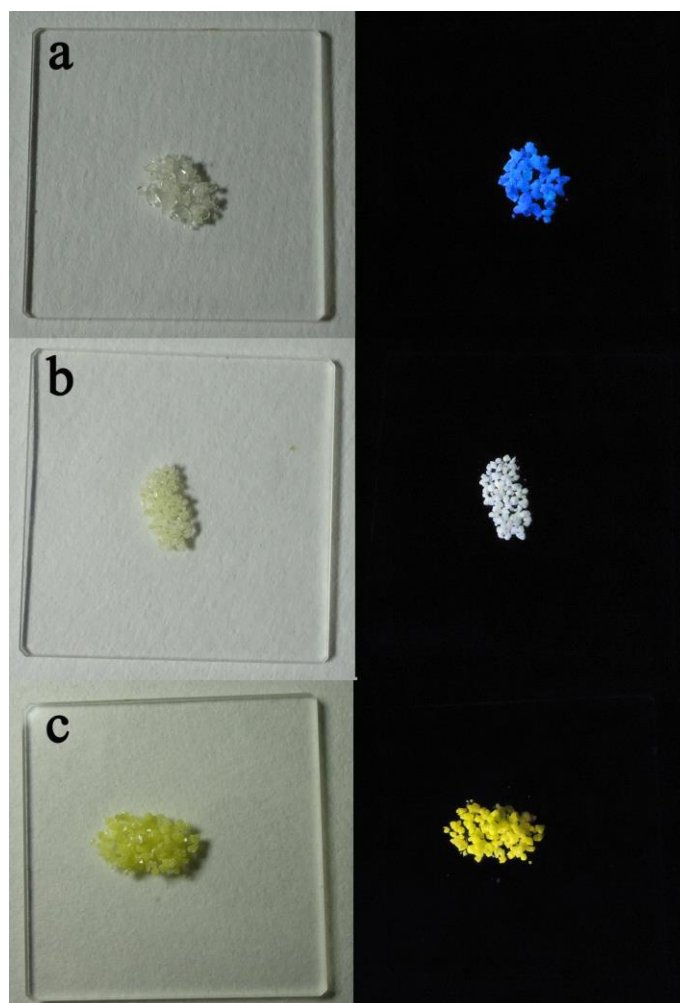

**Supplementary Figure S12 Photographs of 1 and  $[\text{Ir}(\text{ppy})_2(\text{bpy})]^+@1$  (under natural light (left) and laboratory UV light (365 nm, right)). (a) As-synthesized 1. (b) 3.5wt% contained  $[\text{Ir}(\text{ppy})_2(\text{bpy})]^+@1$ . (c) 8.8wt% contained  $[\text{Ir}(\text{ppy})_2(\text{bpy})]^+@1$ .**

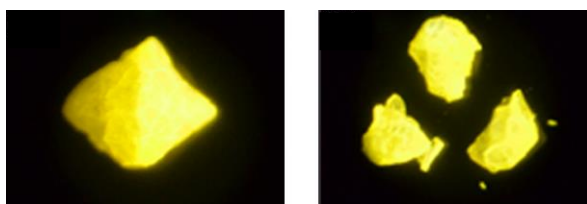

**Supplementary Figure S13 Photographs of crystals.** Photographs of a single crystal of a freshly grown  $[\text{Ir}(\text{ppy})_2(\text{bpy})]^+@1$  (left) and crushed fragments of the same crystal (right).

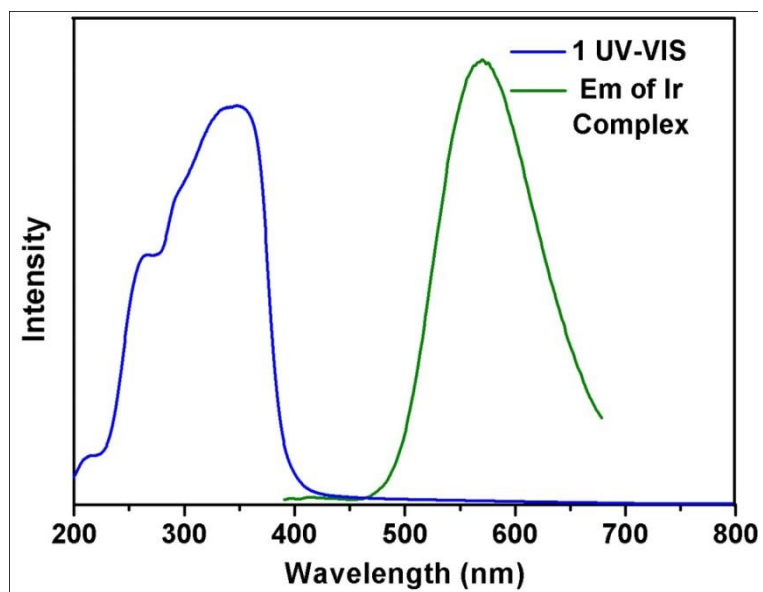

**Supplementary Figure S14 Optical spectra.** The absorption spectrum of **1** (blue), and emission spectrum of the  $[\text{Ir}(\text{ppy})_2(\text{bpy})]^+$  complex excited at 370 nm (green).

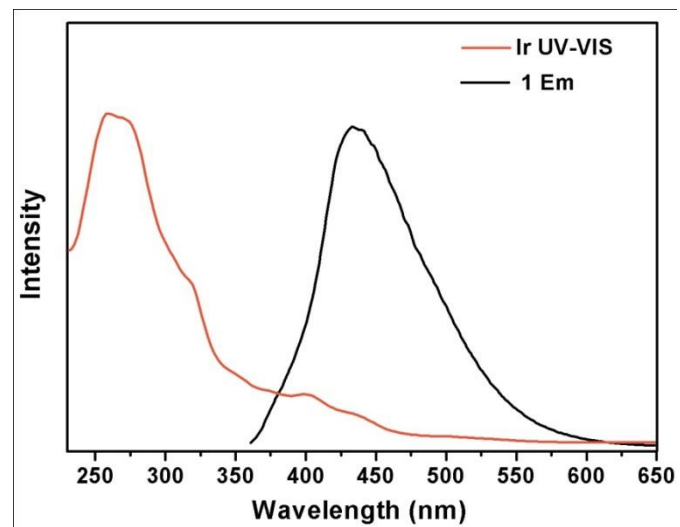

**Supplementary Figure S15 Optical spectra.** The absorption spectrum of the  $[\text{Ir}(\text{ppy})_2(\text{bpy})]^+$  complex (red), and emission spectrum of **1** excited at 340 nm (black).

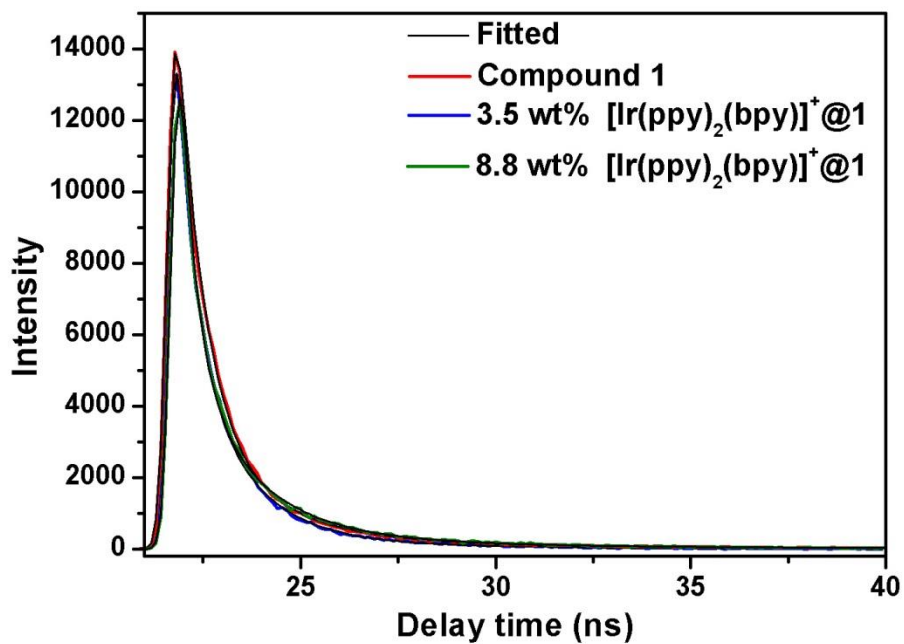

**Supplementary Figure S16 Fluorescence decay profiles.** Fluorescence decay profiles of **1** and [Ir(ppy)<sub>2</sub>(bpy)]<sup>+</sup>@**1** at  $\lambda_{\text{ex}} = 370$  nm and  $\lambda_{\text{em}} = 425$  nm: black, after fitted; red, compound **1**; blue, 3.5% [Ir(ppy)<sub>2</sub>(bpy)]<sup>+</sup>@**1**; green, 8.8% [Ir(ppy)<sub>2</sub>(bpy)]<sup>+</sup>@**1**.



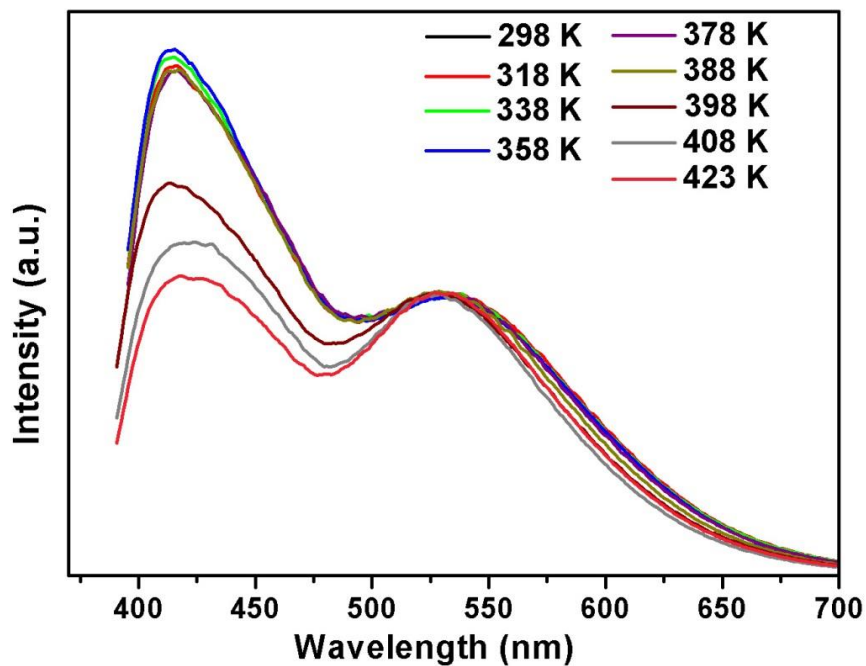

**Supplementary Figure S17 Temperature-dependent photoluminescence spectra.**

Photoluminescence spectra of white-emitting [Ir(ppy)<sub>2</sub>(bpy)]<sup>+</sup>@1 at different temperatures: black, 298K; red, 318K; green, 338K; blue, 358K; violet, 378K; dark yellow, 388K; wine, 398K; gray, 408K; pink, 423K. All measurements were performed on solid samples at an excitation wavelength  $\lambda_{\text{ex}}$  of 370 nm.

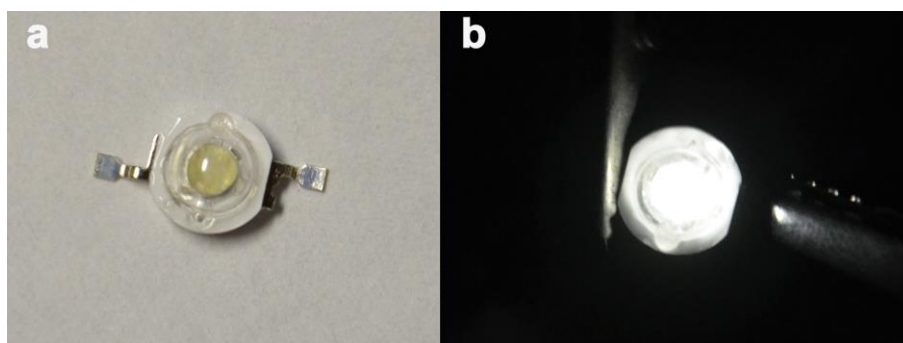

**Supplementary Figure S18** Photographs of the white LED fabricated using a UV InGaAsN LED chip and white phosphor of 3.8 wt%  $[\text{Ir}(\text{ppy})_2(\text{bpy})]^+@1$ . (a) Without current. (b) After applying a forward current of 150 mA.

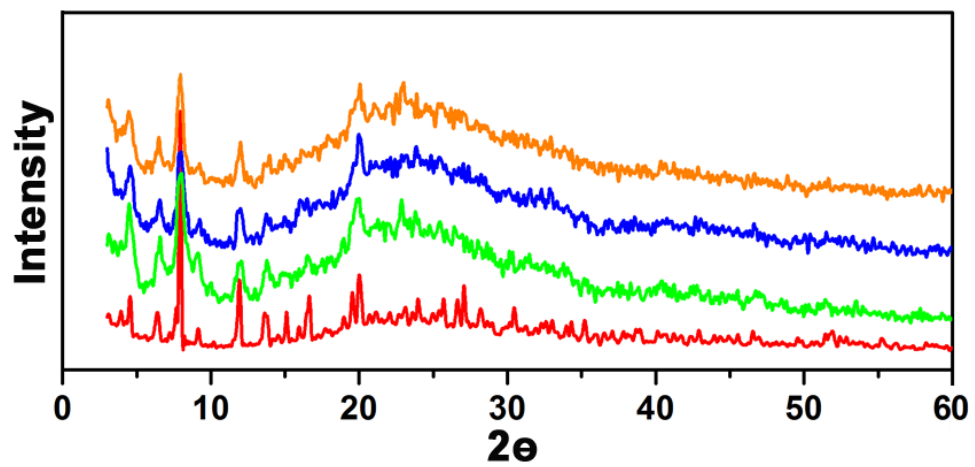

**Supplementary Figure S19 PXRD patterns.** PXRD patterns for **1** and transition metal exchanged **1**: as-synthesized **1**, red;  $\text{Eu}^{3+}$ @**1**, green; **Tb**@**1**, blue; **Eu/Tb**@**1**, orange.

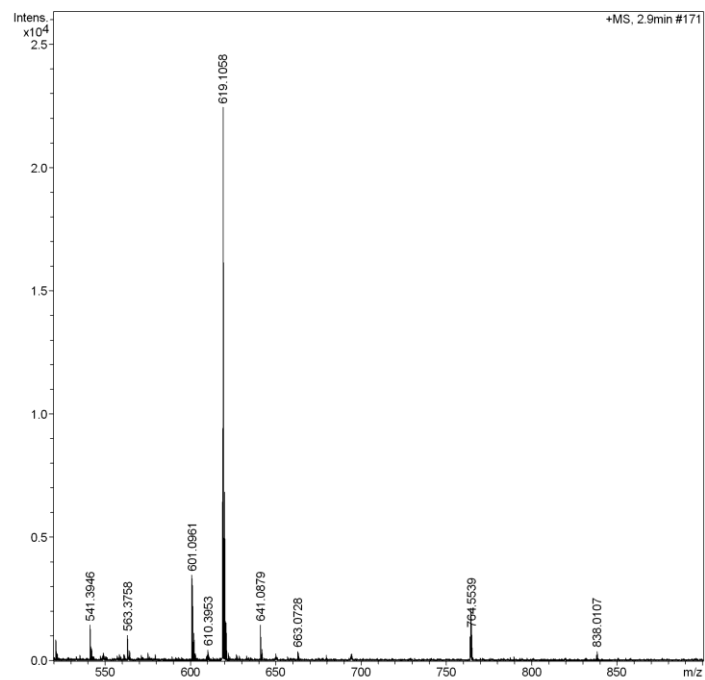

**Supplementary Figure S20 HRMS spectrum for the ligand (H<sub>6</sub>TATPT).** High

resolution mass spectra (HRMS) were recorded on Bruker microTof using ESI method.

(ESI)  $m/z$  calcd for C<sub>27</sub>H<sub>18</sub>N<sub>6</sub>O<sub>12</sub> [M+H]<sup>+</sup>: 619.1016 found: 619.1058.

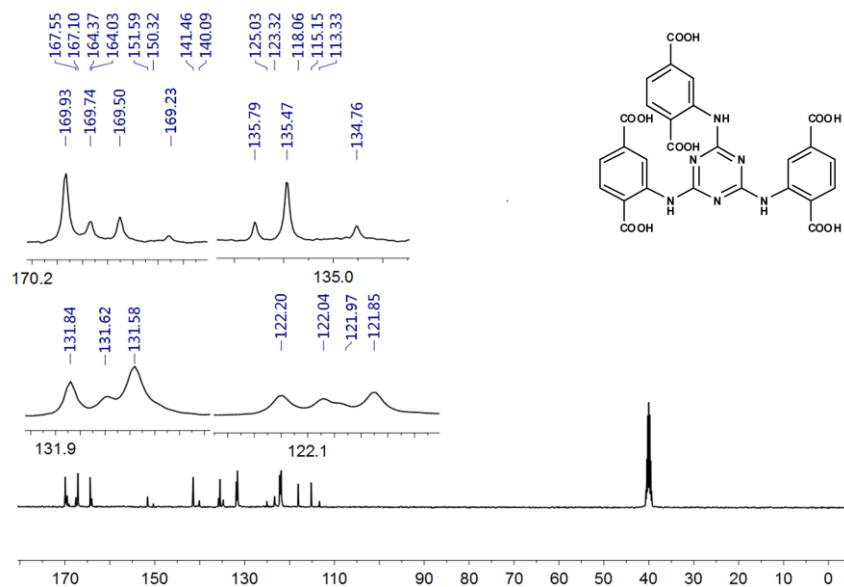

**Supplementary Figure S21** <sup>13</sup>C-NMR spectrum for the ligand (H<sub>6</sub>TATPT, C<sub>27</sub>H<sub>18</sub>N<sub>6</sub>O<sub>12</sub>). Data were recorded on a Bruker AV400 NMR (400 MHz) at 25 °C.

**Supplementary Table S1** Crystal data and structural refinement of compound **1**; for atomic coordinates, equivalent isotropic displacement parameters, bond lengths, angles, and anisotropic displacement parameters please see the CIF (CCDC code 916964).

| Empirical formula                       | $C_{174}H_{288}N_{51}O_{78}Cl_3Cd_6$ |
|-----------------------------------------|--------------------------------------|
| Formula weight                          | 5147.52                              |
| Temperature (K)                         | 296                                  |
| Crystal system                          | cubic                                |
| Space group                             | <i>Fm-3m</i>                         |
| Unit cell dimensions                    |                                      |
| a (Å)                                   | 38.527(2)                            |
| b (Å)                                   | 38.527(2)                            |
| c (Å)                                   | 38.527(2)                            |
| $\alpha$ (°)                            | 90                                   |
| $\beta$ (°)                             | 90                                   |
| $\gamma$ (°)                            | 90                                   |
| Volume (Å <sup>3</sup> )                | 57186.8 (6)                          |
| Z                                       | 8                                    |
| Calculated density (mg/m <sup>3</sup> ) | 1.196                                |
| F(000)                                  | 12600                                |
| Crystal size (mm <sup>3</sup> )         | 0.86 × 0.44 × 0.24                   |
| $R_{int}$                               | 0.0697                               |
| Goodness-of-fit on $F^2$                | 1.052                                |
| Final R indices [ $I > 2\sigma(I)$ ]    | $R_1 = 0.0896$ , $wR_2 = 0.2749$     |

**Supplementary Table S2** The concentration of  $\text{Cu}^{2+}$ ,  $\text{Co}^{2+}$ ,  $\text{Ni}^{2+}$ , and  $\text{Zn}^{2+}$  in compound **1**.

| Transition metal | The concentration of transition | The concentration of transition |
|------------------|---------------------------------|---------------------------------|
|                  | metal (wt%)                     | metal per formula               |
| Co               | 5.268                           | 0.37                            |
| Cu               | 7.021                           | 0.46                            |
| Ni               | 3.615                           | 0.26                            |
| Zn               | 4.307                           | 0.28                            |

**Supplementary Table S3** The CIE coordinates of  $[\text{Ir}(\text{ppy})_2(\text{bpy})]^+@1$  at various concentration of  $[\text{Ir}(\text{ppy})_2(\text{bpy})]^+$ .

| Sample | CIE coordinate |       | The concentration of $[\text{Ir}(\text{ppy})_2(\text{bpy})]^+$<br>( respect to Cd wt%) |
|--------|----------------|-------|----------------------------------------------------------------------------------------|
|        | X              | Y     |                                                                                        |
| 1      | 0.175          | 0.145 | 0                                                                                      |
| 2      | 0.231          | 0.206 | 0.526                                                                                  |
| 3      | 0.254          | 0.239 | 1.04                                                                                   |
| 4      | 0.311          | 0.330 | 3.52                                                                                   |
| 5      | 0.322          | 0.352 | 3.73                                                                                   |
| 6      | 0.350          | 0.429 | 4.52                                                                                   |
| 7      | 0.371          | 0.468 | 7.50                                                                                   |
| 8      | 0.400          | 0.501 | 8.83                                                                                   |



**Supplementary Table S4** Summary of the quantum yield of the reported white-emitting MOFs.

| Compound                                                         | Quantum yield | Reference number |
|------------------------------------------------------------------|---------------|------------------|
| PbL2 <sup>a</sup>                                                | 2–3%          | 26               |
| Eu-SMOF-1 <sup>b</sup>                                           | 4.3%          | 25               |
| ZJU-1:1.5% Tb <sup>3+</sup> , 2.0% Eu <sup>3+</sup> <sup>c</sup> | 6.8%          | 12               |
| [AgL] <sub>n</sub> nH <sub>2</sub> O <sup>d</sup>                | 10.86%        | 23               |
| Eu/Tb@1 <sup>e</sup>                                             | 11.3%         | this work        |
| [Ir(ppy) <sub>2</sub> (bpy)] <sup>+</sup> @1 <sup>e</sup>        | 20.4%         | this work        |

<sup>a</sup>L2 = 2,5-bis(((S)-2-hydroxypropyl)thio)terephthalic acid

<sup>b</sup>SMOF-1 = In(BTB)<sub>2/3</sub>(OA)(DEF)<sub>3/2</sub> (BTB = 1,3,5-Tris(4-carboxyphenyl)benzene, OA = oxalic acid,

DEF = N,N'-diethylformamide)

<sup>c</sup>ZJU-1 = Na<sub>3</sub>[La(PDA)<sub>3</sub>](H<sub>2</sub>O)<sub>12</sub> (PDA = pyridine-2,6-dicarboxylate)

<sup>d</sup>L = 4-cyanobenzoate

<sup>e</sup>1 = [(CH<sub>3</sub>)<sub>2</sub>NH<sub>2</sub>]<sub>1.25</sub>[(Cd<sub>0.5</sub>Cl<sub>0.25</sub>)(TATPT)<sub>1/3</sub>]·DMF·1.5H<sub>2</sub>O, (TATPT =

2,4,6-tris(2,5-dicarboxylphenylamino)-1,3,5-triazine, DMF = N,N-Dimethylformamide)

**Supplementary Table S5** Quantum yield of white-emitting  $[\text{Ir}(\text{ppy})_2(\text{bpy})]^+@1$  at different temperatures.

|                   |      |      |      |      |      |      |
|-------------------|------|------|------|------|------|------|
| Temperature (K)   | 298  | 378  | 388  | 398  | 408  | 423  |
| Quantum yield (%) | 20.7 | 21.1 | 20.1 | 19.7 | 18.5 | 17.9 |

**Supplementary Table S6** Correlated color temperature (CCT) and color rendering index (CRI) for white LED.

| CCT<br>(K) | CRI  | CIE  |      |
|------------|------|------|------|
|            |      | x    | y    |
| 5409       | 84.5 | 0.30 | 0.35 |
